# Supplementary material for: Solvmate – a hybrid physical/ML approach to solvent recommendation leveraging a rank-based problem framework
Source: Royal Society of Chemistry journal article supplement (doi:10.1039/d4dd00138a), 2024-01-01

# SI: Solvmate - A Hybrid Physical/ML Approach to Solvent Recommendation Leveraging a Rank-based Problem Framing

## Contents

|   |                                                      |    |
|---|------------------------------------------------------|----|
| 1 | Data summary statistics                              | 2  |
| 2 | Evaluation on full dataset                           | 3  |
| 3 | XTB configuration                                    | 4  |
| 4 | Feature importance                                   | 5  |
| 5 | Parity plots                                         | 6  |
| 6 | Error analysis by solvent                            | 7  |
| 7 | Runtime analysis                                     | 8  |
| 8 | Linear ranking: Comparing algorithms for to-seq step | 9  |
| 9 | Examples                                             | 10 |

# 1 Data summary statistics

Table 1: Top solvent counts by data source.

| <b>open notebook</b> |       | <b>nova</b>            |       | <b>bayer_internal</b> |       |
|----------------------|-------|------------------------|-------|-----------------------|-------|
| solvent              | count | solvent                | count | solvent               | count |
| water                | 610   | methanol               | 319   | ethanol               | 95    |
| water : PEG-400      | 369   | nitromethane           | 319   | acetonitrile          | 57    |
| 1-octanol            | 322   | acetone                | 319   | tetrahydrofuran       | 56    |
| methanol             | 294   | dimethylformamide      | 319   | acetone               | 56    |
| ethanol              | 284   | methyl isobutyl ketone | 319   | ethyl acetate         | 56    |
| ethanol : water      | 264   | ethyl acetate          | 319   | 2-propanol            | 55    |
| tetrahydrofuran      | 152   | ethanol                | 319   | heptane               | 53    |
| 2-propanol           | 123   | toluene                | 319   | cyclohexane           | 53    |
| acetonitrile         | 121   | acetonitrile           | 318   | ditertbutylether      | 53    |
| 1-propanol           | 117   | methyl t-butylether    | 318   | toluene               | 51    |
| toluene              | 112   | chlorobenzene          | 318   | water                 | 49    |
| chloroform           | 109   | chloroform             | 317   | methanol              | 47    |
| 1-butanol            | 102   | 2-propanol             | 315   | dichloromethane       | 33    |
| dimethyl sulfoxide   | 97    | 2-butanone             | 315   |                       |       |
| acetone              | 97    | tetrahydrofuran        | 315   |                       |       |
| PEG-400              | 97    | methylene chloride     | 315   |                       |       |
| ethyl acetate        | 90    | diethyl ether          | 315   |                       |       |
| 1-pentanol           | 79    | hexane                 | 314   |                       |       |
| cyclohexane          | 71    |                        |       |                       |       |
| 1-hexanol            | 66    |                        |       |                       |       |

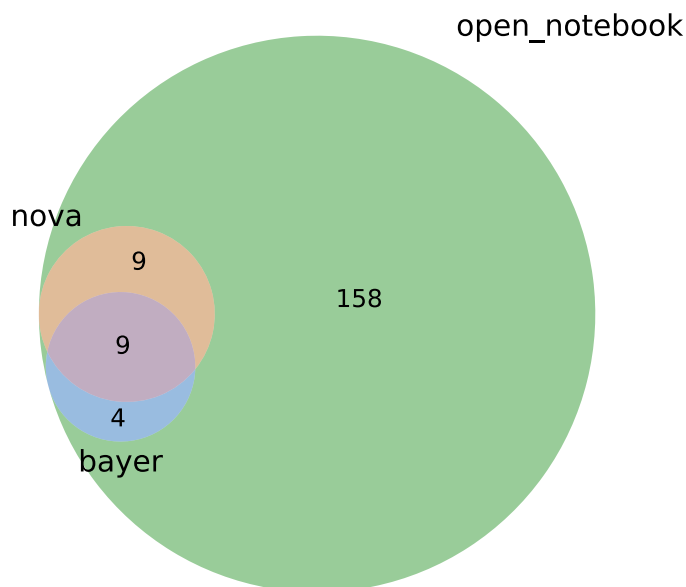

Figure S1: Venn diagram of solvent overlaps between data sources

## 2 Evaluation on full dataset

Table 2: Results of evaluation on the complete dataset.

| feature    | relation        | rho (rand)        | rho (butina)      | rho (solvent)     | rho (ood(novartis)) | rho (ood(bayer))  |
|------------|-----------------|-------------------|-------------------|-------------------|---------------------|-------------------|
| cddd       | absolute        | 0.628±0.03        | 0.572±0.03        | 0.231±0.12        | 0.397±0.02          | 0.617±0.01        |
|            | relative_concat | 0.637±0.04        | <b>0.622±0.05</b> | 0.477±0.32        | 0.686±0.05          | 0.59±0.02         |
|            | relative_diff   | <b>0.646±0.02</b> | 0.615±0.04        | 0.42±0.34         | 0.706±0.03          | 0.609±0.03        |
| ecfp_bit   | absolute        | 0.468±0.05        | 0.317±0.09        | 0.074±0.17        | 0.177±0.08          | 0.3±0.06          |
|            | relative_concat | 0.523±0.03        | 0.471±0.07        | 0.279±0.28        | 0.647±0.05          | 0.281±0.2         |
|            | relative_diff   | 0.533±0.07        | 0.527±0.04        | 0.25±0.27         | 0.654±0.09          | 0.284±0.18        |
| ecfp_count | absolute        | 0.564±0.04        | 0.461±0.05        | 0.115±0.19        | 0.167±0.06          | 0.52±0.02         |
|            | relative_concat | 0.583±0.02        | 0.502±0.09        | 0.38±0.21         | 0.701±0.05          | 0.483±0.03        |
|            | relative_diff   | 0.53±0.07         | 0.428±0.11        | 0.351±0.21        | 0.699±0.05          | 0.475±0.04        |
| prior      | absolute        | 0.458±0.04        | 0.446±0.05        | -0.112±0.17       | 0.298±0.02          | 0.571±0.0         |
| rand       | absolute        | 0.035±0.11        | -0.064±0.14       | -0.004±0.19       | 0.012±0.1           | 0.096±0.16        |
| xtb        | absolute        | 0.604±0.04        | 0.552±0.05        | 0.429±0.09        | 0.389±0.03          | 0.456±0.13        |
|            | relative_concat | 0.637±0.02        | 0.595±0.07        | <b>0.531±0.24</b> | <b>0.729±0.01</b>   | 0.63±0.02         |
|            | relative_diff   | 0.616±0.04        | 0.583±0.05        | 0.466±0.26        | 0.684±0.04          | <b>0.639±0.01</b> |

### 3 XTB configuration

We used the xtb executable in version 6.5.1 as provided here: <https://github.com/grimme-lab/xtb/releases> The calls to the xtb executable follow this scheme:

```
xtb input.xyz --opt --alpb {solvent} > output.out 2> err.out
```

## 4 Feature importance

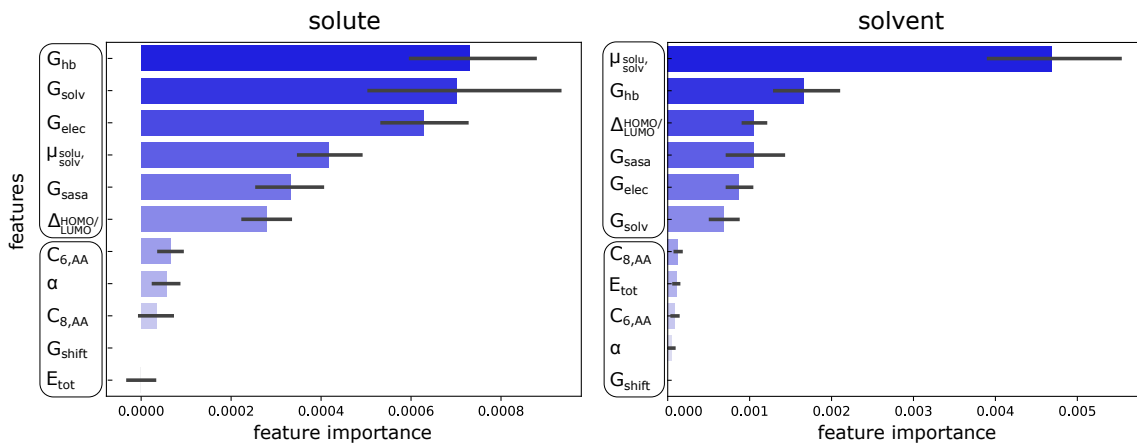

Figure S2: Feature importance analysis for solute features (*left*) and solvent features (*right*).

Table 3: Overview of the features selected from the xTB output.

| variable             | description                                    | unit                   |
|----------------------|------------------------------------------------|------------------------|
| $G_{solv}$           | energy of solvation                            | kcal/mol               |
| $G_{elec}$           | electronic energy                              | kcal/mol               |
| $G_{sasa}$           | part. energy (solvent accessible surface area) | kcal/mol               |
| $G_{hb}$             | part. energy (hydrogen bonding)                | kcal/mol               |
| $G_{shift}$          | shift energy                                   | kcal/mol               |
| $E_{tot}$            | total energy                                   | kcal/mol               |
| $\Delta_{HOMO/LUMO}$ | HOMO-LUMO gap                                  | eV                     |
| $\mu_{solv,solv}$    | dipole moment                                  | Db                     |
| $C_{6,AA}$           | $C_6$ dispersion coefficient                   | au · bohr <sup>6</sup> |
| $C_{8,AA}$           | $C_8$ dispersion coefficient                   | au · bohr <sup>8</sup> |
| $\alpha$             | $\alpha(0)$ dispersion coefficient             | au                     |

## 5 Parity plots

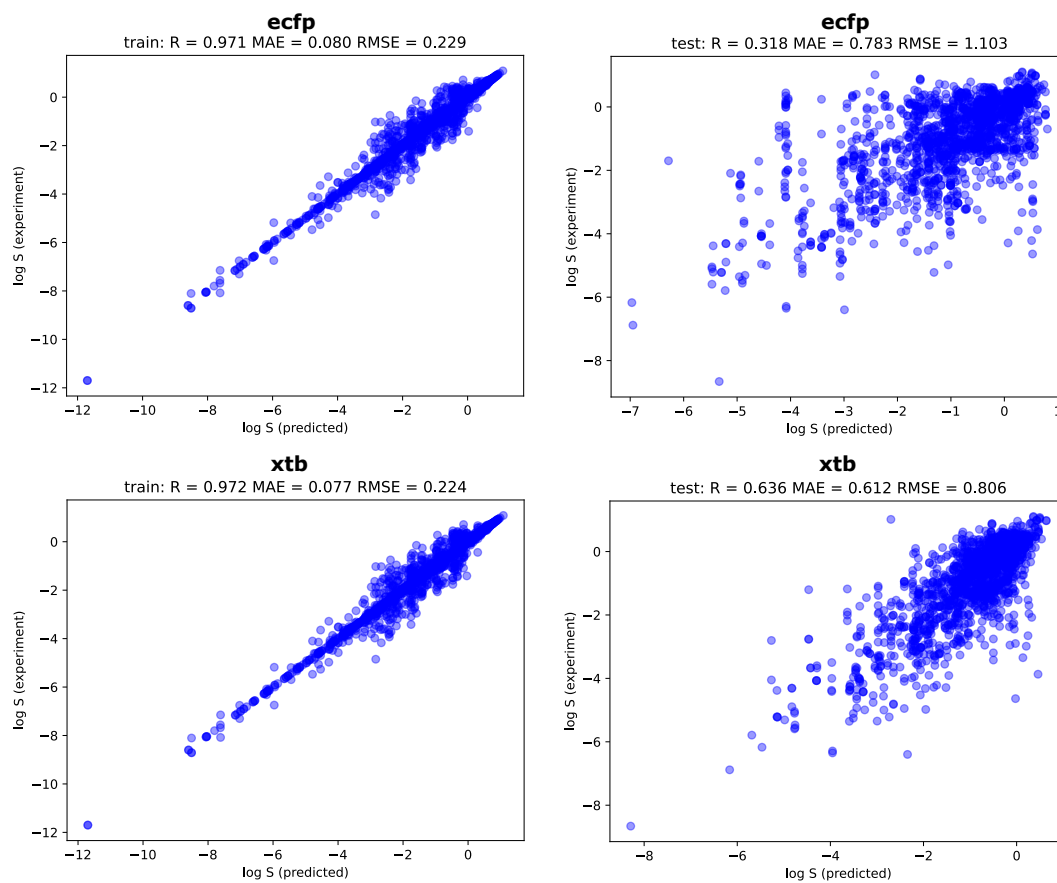

Figure S3: Parity plots of absolute solubility ET regression models for random train/test (60%:40%) split. *top left*: ecfp-model on training set. *top right*: ecfp-model on test set. *bottom left*: xtb-model on training set. *bottom right*: xtb-model on test set.

## 6 Error analysis by solvent

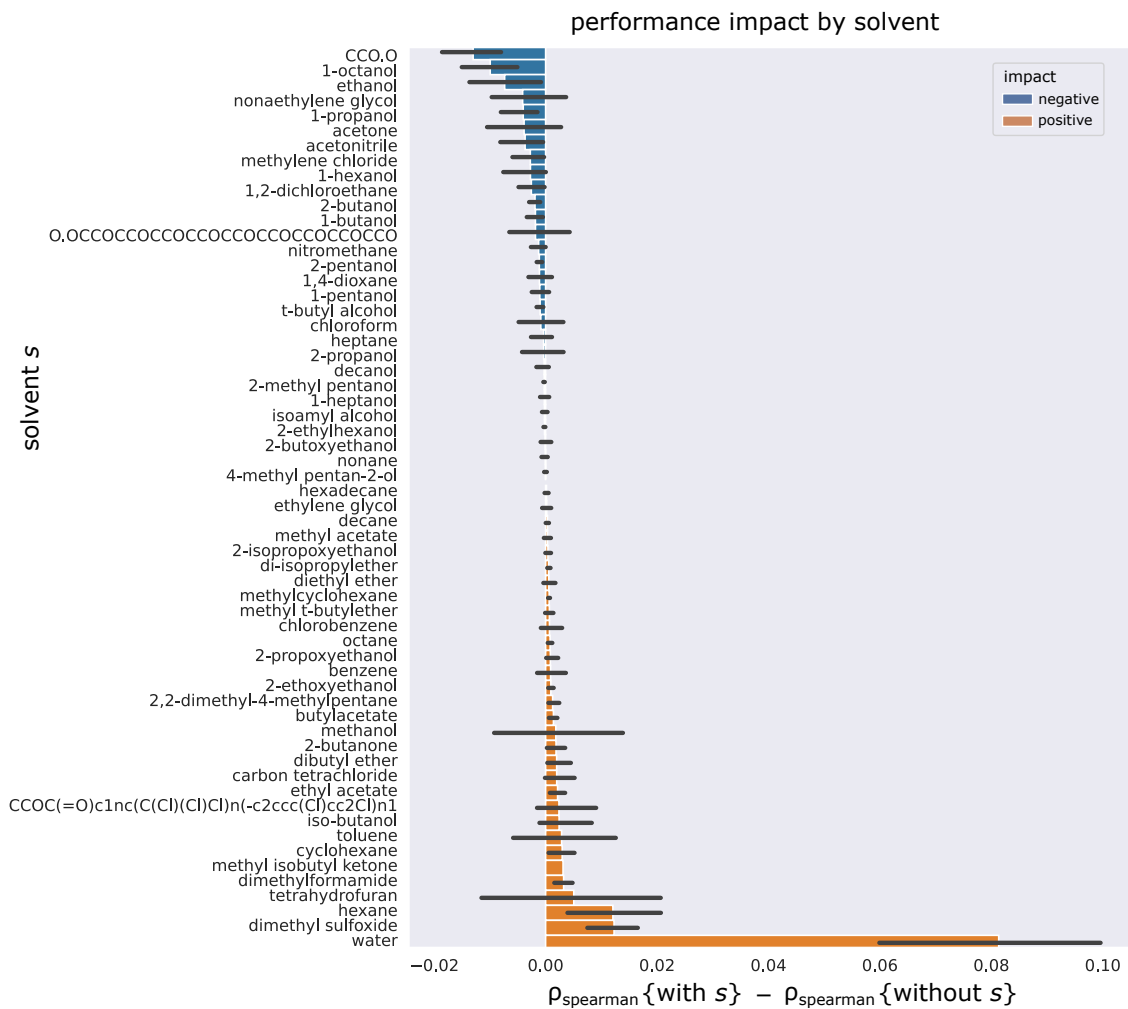

Figure S4: Performance impact by solvent sorted from most negative/hard-to-rank solvent at the top (ethanol-water mixture, CCO.O), to most positive/easy-to-rank at the bottom (water, DMSO, hexane). IUPAC names are reported where possible, else the SMILES is reported.

## 7 Runtime analysis

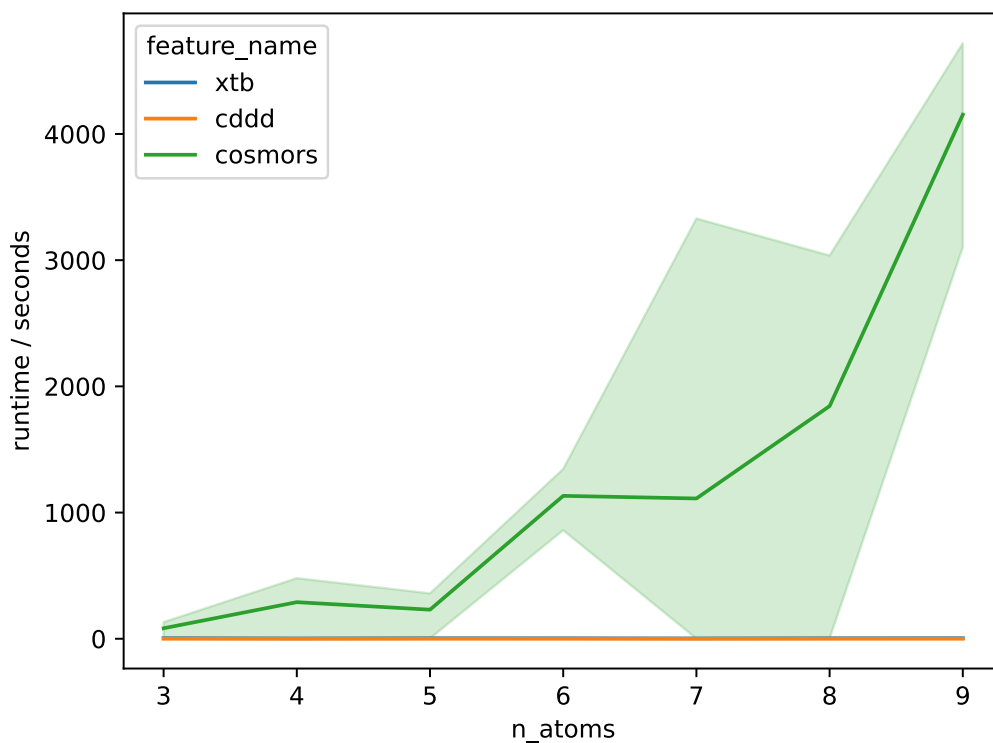

Figure S5: Runtime of the CDDD, XTBB, and COSMO-RS featurizers against number of atoms for randomly drawn SMILES containing the elements carbon, nitrogen and oxygen. Extrapolated to typical drug-like molecules, CDDD calculations take seconds, the XTBB calculations take minutes, while COSMO+COSMO-RS calculations require runtimes of several days to weeks for a single solute compound.



## 8 Linear ranking: Comparing algorithms for to-seq step

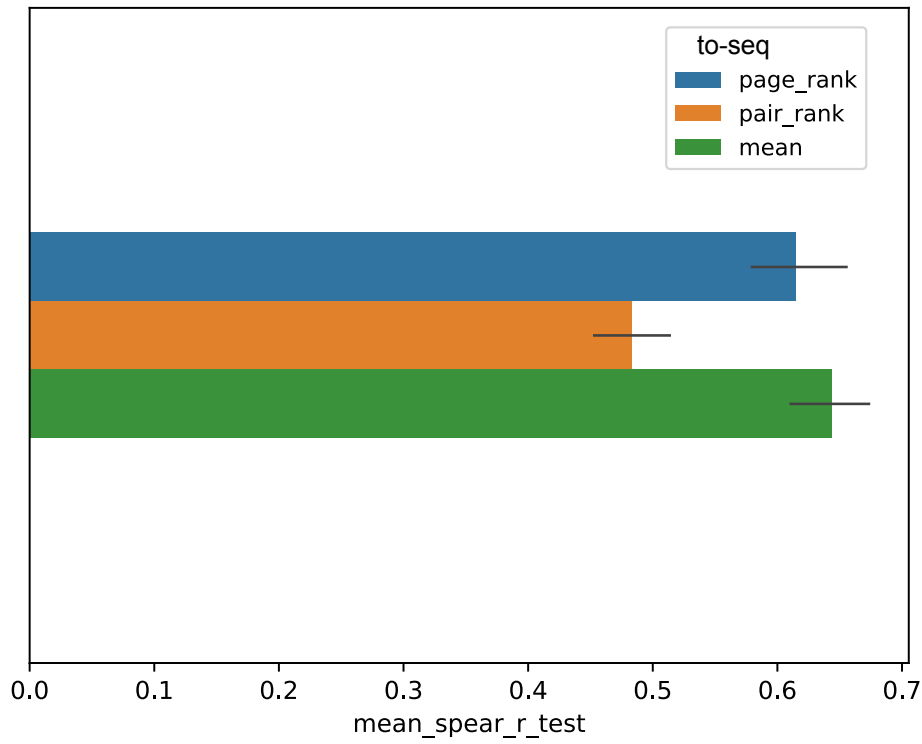

Figure S6: Both pair rank and page rank algorithms were not found to outperform the simpler procedure of mean aggregation. The superiority of the mean procedure over pair rank is statistically significant (T-test:  $t \approx 7$ , p-value 0.00016), while page rank and mean perform comparably (T-test:  $t \approx 1$ , p-value 0.32). Therefore, it was decided to adhere to the simpler and slightly better performing mean aggregation procedure.

## 9 Examples

In the following section, the solvent ranking is shown (screenshots of the web application) for ten neutral molecules and two salts.

In each case, the top shows the solute and solvents selected as input. For convenience, two solvent sets have been defined: The *ess* (extended-solvent-screening) dataset consisting of 15 representative solvents, and the default dataset consisting of a comprehensive set of 59 organic solvents.

The ranking output is shown as the bottom panel, and consists of a boxplot across five ensemble predictions. This way, the uncertainty of the ranking can be assessed. Lower *pos\_index* values correspond to a higher solubility. The vertical axis has been arranged so that the best solvent (lowest *pos\_index*) is shown at the top.

#1 — 1,1-Dicyclohexylpropane

#2 — hydroxylation of 1,1-Dicyclohexylpropane

#3 — chlorination of 1,1-Dicyclohexylpropane

#4 — Aspirin

#5 — Daptomycin

#6 — Rivaroxaban

#7 — Copanlisib

#8 — adamantane

#9 — cyclodextrin A

#10 — Abexinostat

#11 — tetramethylammonium chloride

#12 — sodium hexafluorophosphate

#1

solute:

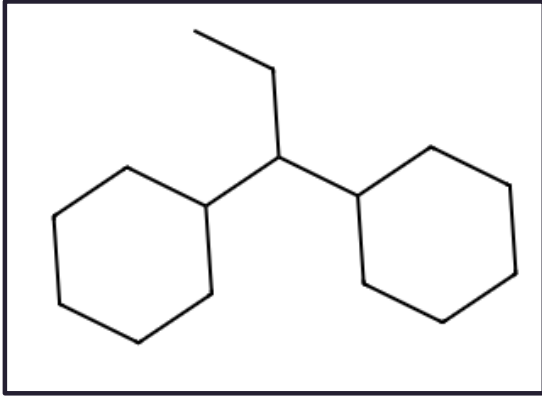

solvents:

ess default + 

- n-Heptan
- Cyclohexan
- Diisopropylether
- Toluol
- Tetrahydrofuran
- Aceton
- Ethylacetat
- ACN
- 2-Propanol
- Ethanol
- EtOH / Wasser 1:1
- Methanol

ranking:

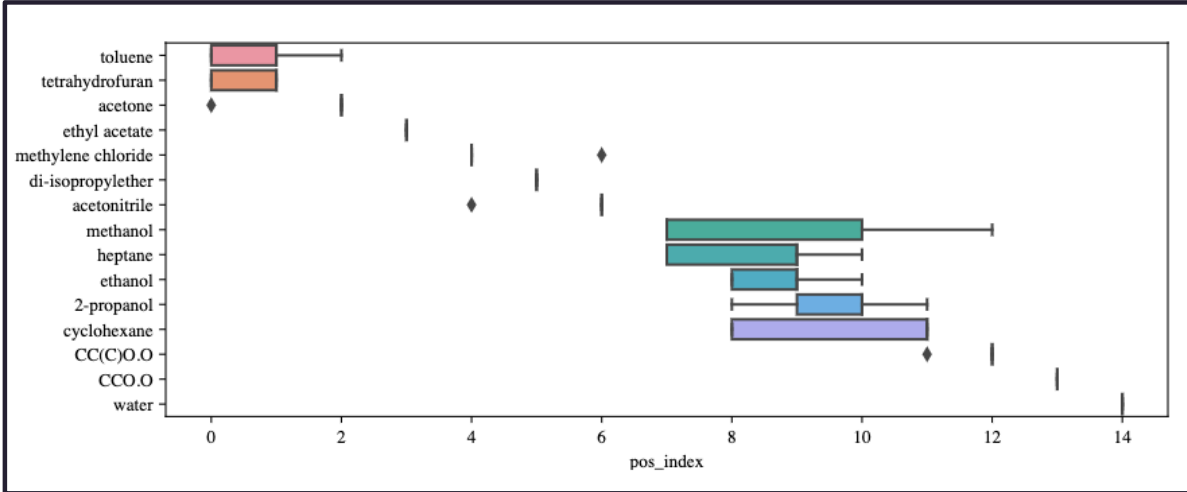

#2

solute:

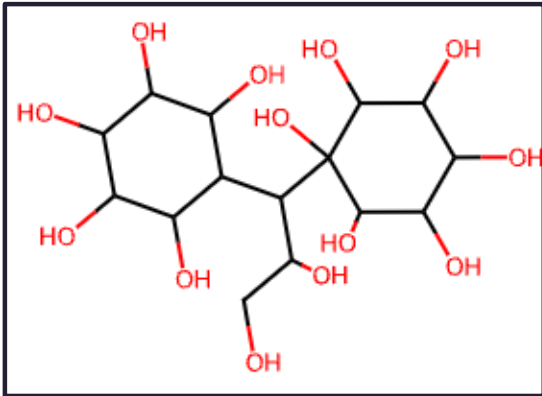

solvents:

ess default + 

- n-Heptan
- Cyclohexan
- Diisopropylether
- Toluol
- Tetrahydrofuran
- Aceton
- Ethylacetat
- ACN
- 2-Propanol
- Ethanol
- EtOH / Wasser 1:1
- Methanol

ranking:

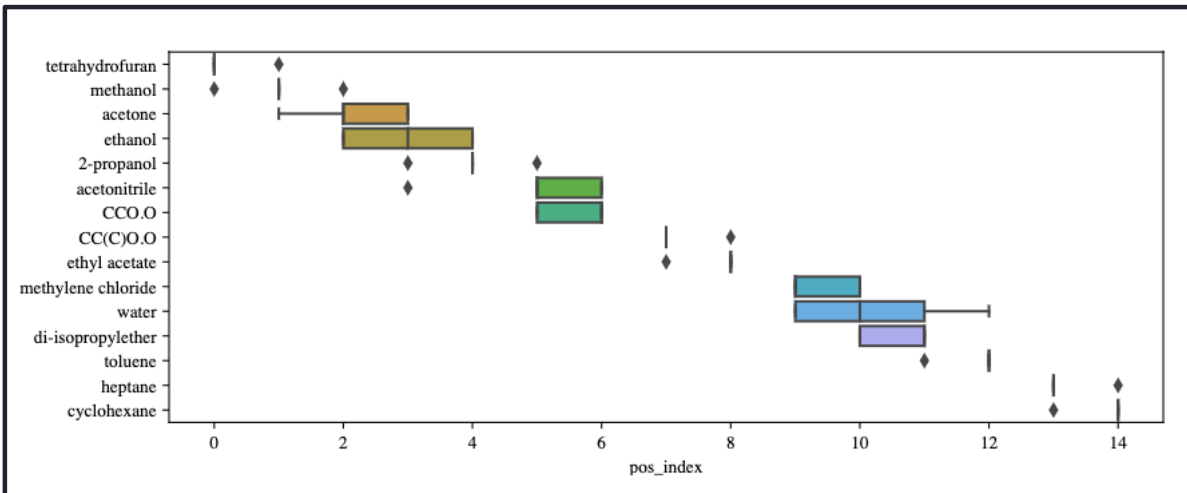

#3

solute:

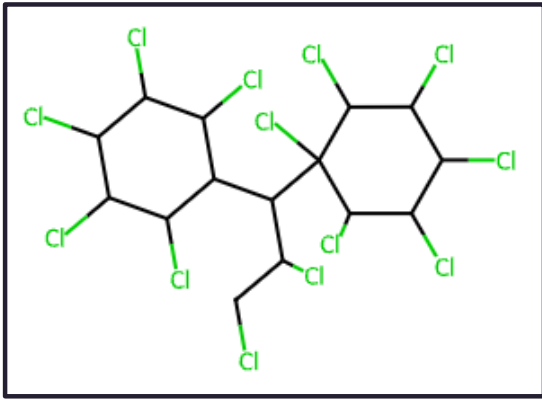

solvents:

ess default +

- n-Heptan
- Cyclohexan
- Diisopropylether
- Toluol
- Tetrahydrofuran
- Aceton
- Ethylacetat
- ACN
- 2-Propanol
- Ethanol
- EtOH / Wasser 1:1
- Methanol

ranking:

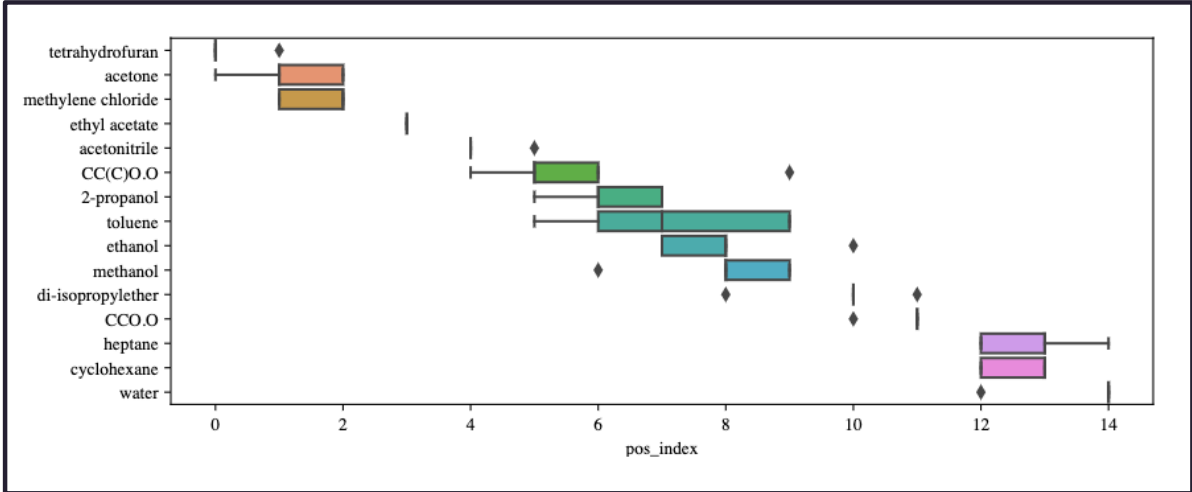

#4\*

solute: Aspirin

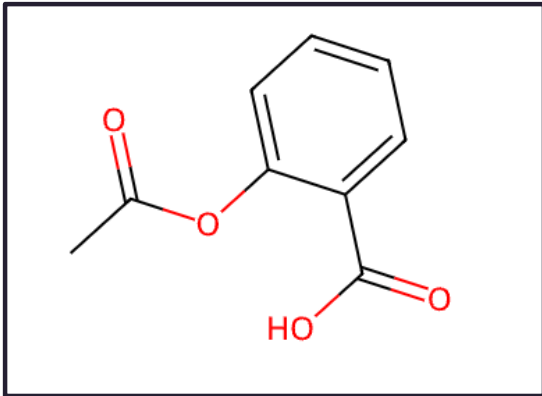

solvents:

ess default +

- n-Heptan
- Cyclohexan
- Diisopropylether
- Toluol
- Tetrahydrofuran
- Aceton
- Ethylacetat
- ACN
- 2-Propanol
- Ethanol
- EtOH / Wasser 1:1
- Methanol

ranking:

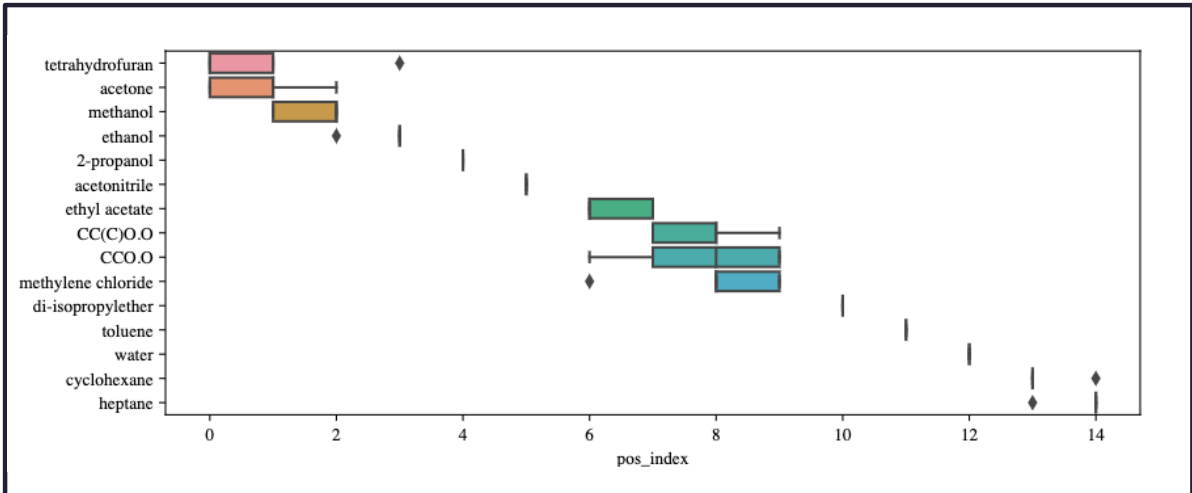

\*contained in training set

#5

solute: Daptomycin

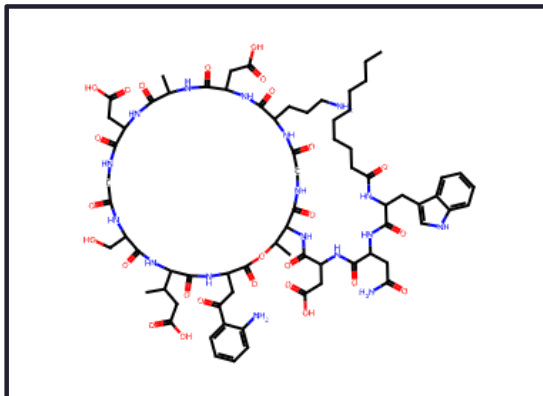

solvents:

ess default + 

- n-Heptan
- Cyclohexan
- Diisopropylether
- Toluol
- Tetrahydrofuran
- Aceton
- Ethylacetat
- ACN
- 2-Propanol
- Ethanol
- EtOH / Wasser 1:1
- Methanol

ranking:

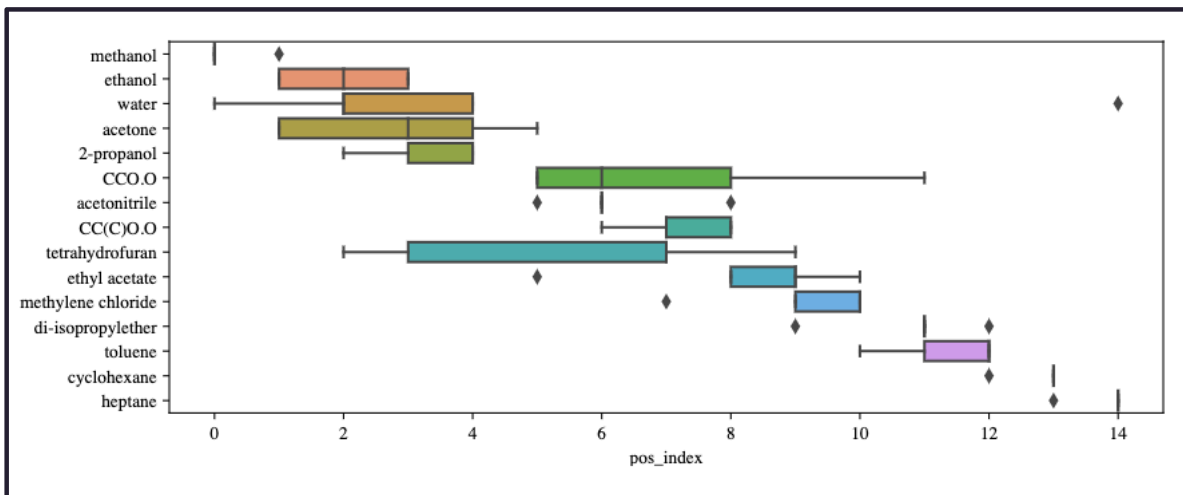

#6

solute: Rivaroxaban

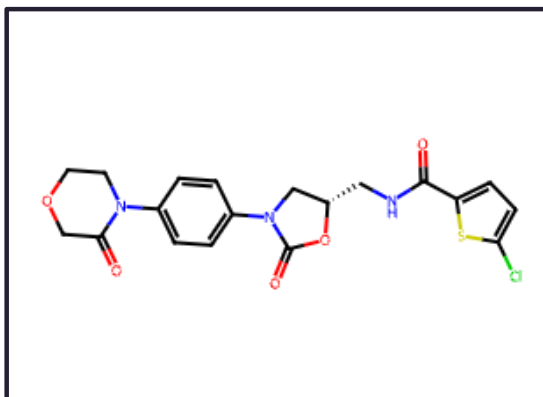

solvents:

ess default + 

- n-Heptan
- Cyclohexan
- Diisopropylether
- Toluol
- Tetrahydrofuran
- Aceton
- Ethylacetat
- ACN
- 2-Propanol
- Ethanol
- EtOH / Wasser 1:1
- Methanol

ranking:

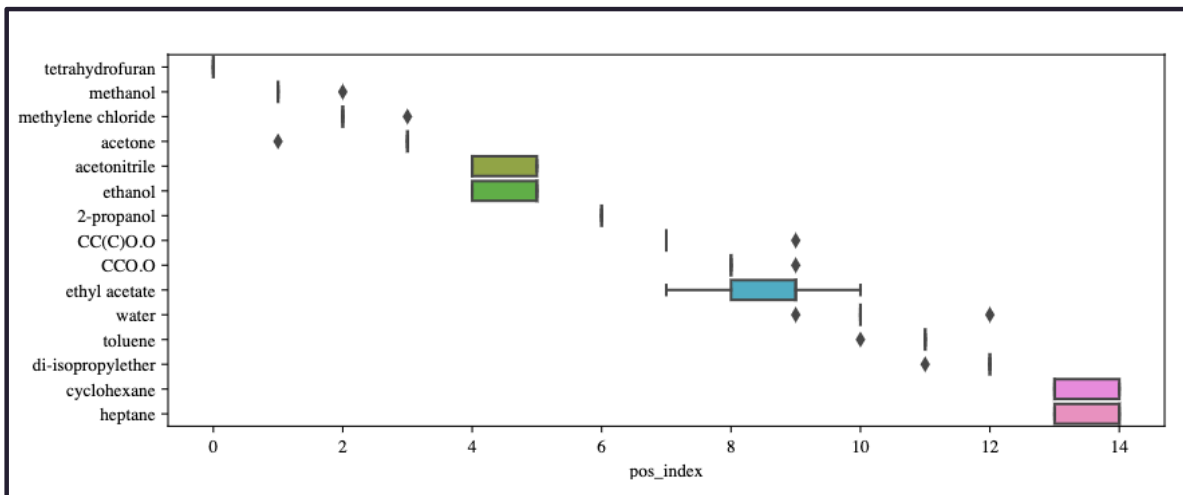

#7

solute: Copanlisib

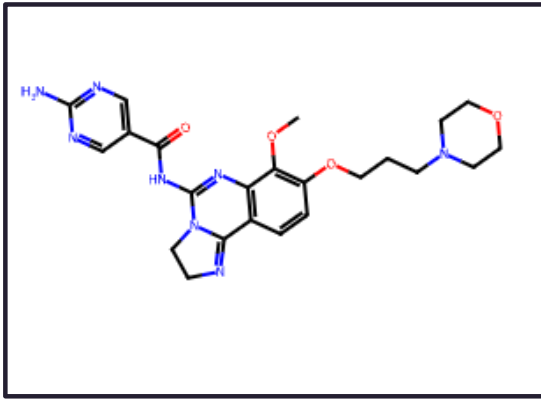

solvents:

ess default +

- n-Heptan
- Cyclohexan
- Diisopropylether
- Toluol
- Tetrahydrofuran
- Aceton
- Ethylacetat
- ACN
- 2-Propanol
- Ethanol
- EtOH / Wasser 1:1
- Methanol

ranking:

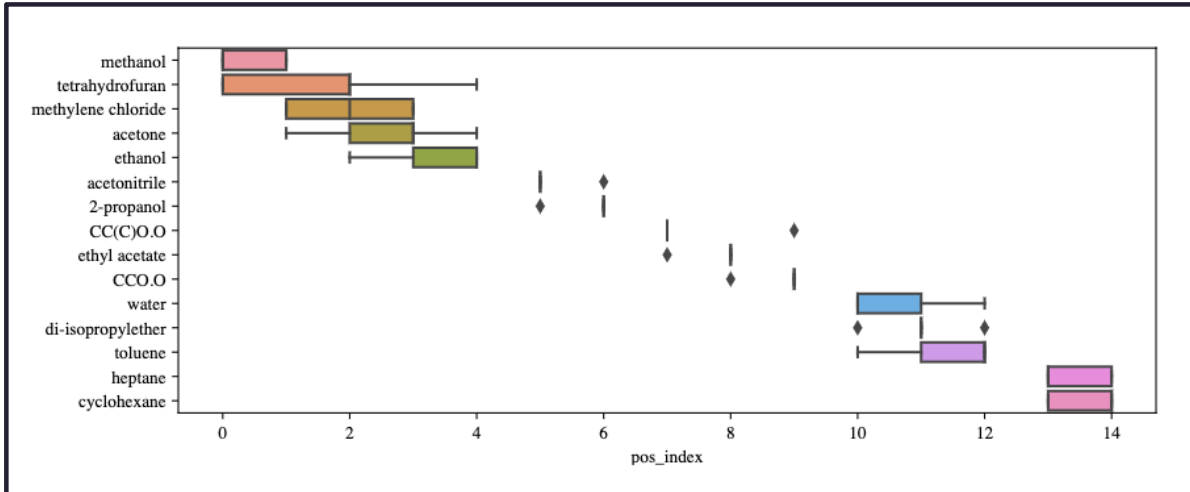

#8

solute: adamantane

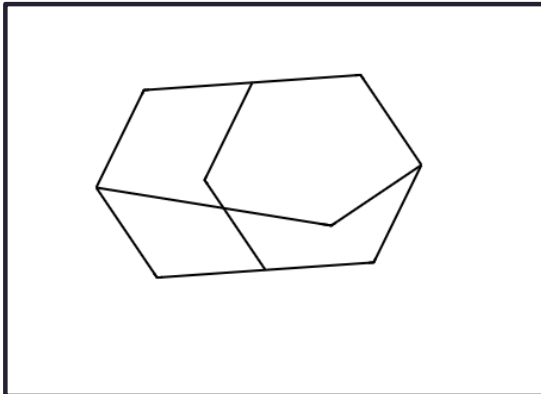

solvents:

ess default +

- n-Heptan
- Cyclohexan
- Diisopropylether
- Toluol
- Tetrahydrofuran
- Aceton
- Ethylacetat
- ACN
- 2-Propanol
- Ethanol
- EtOH / Wasser 1:1
- Methanol

ranking:

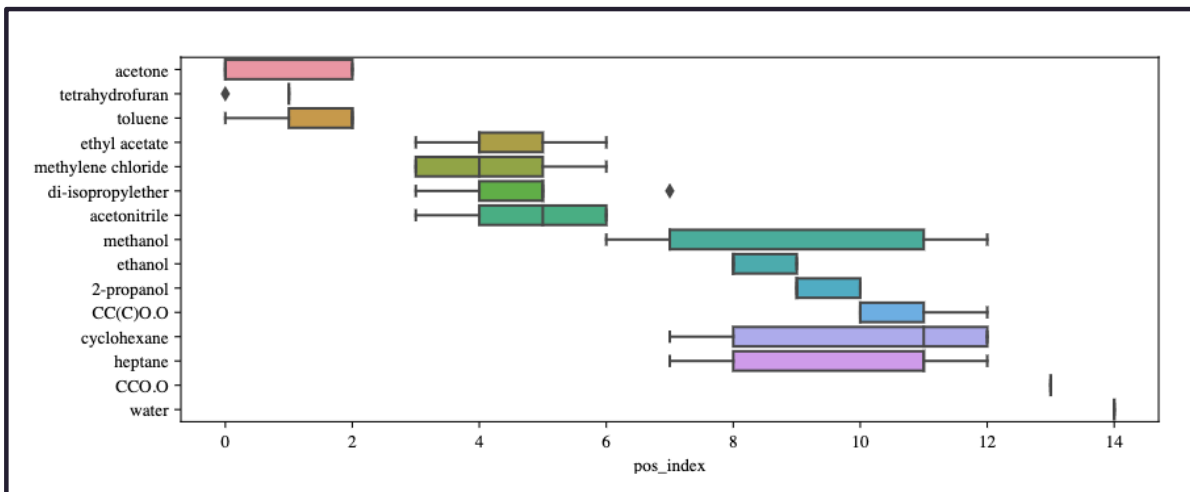

#9

solute: Cyclodextrin A

solvents:

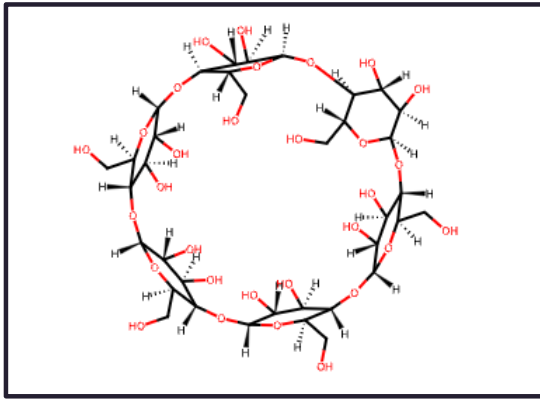

ess default +

- n-Heptan
- Cyclohexan
- Diisopropylether
- Toluol
- Tetrahydrofuran
- Aceton
- Ethylacetat
- ACN
- 2-Propanol
- Ethanol
- EtOH / Wasser 1:1
- Methanol

ranking:

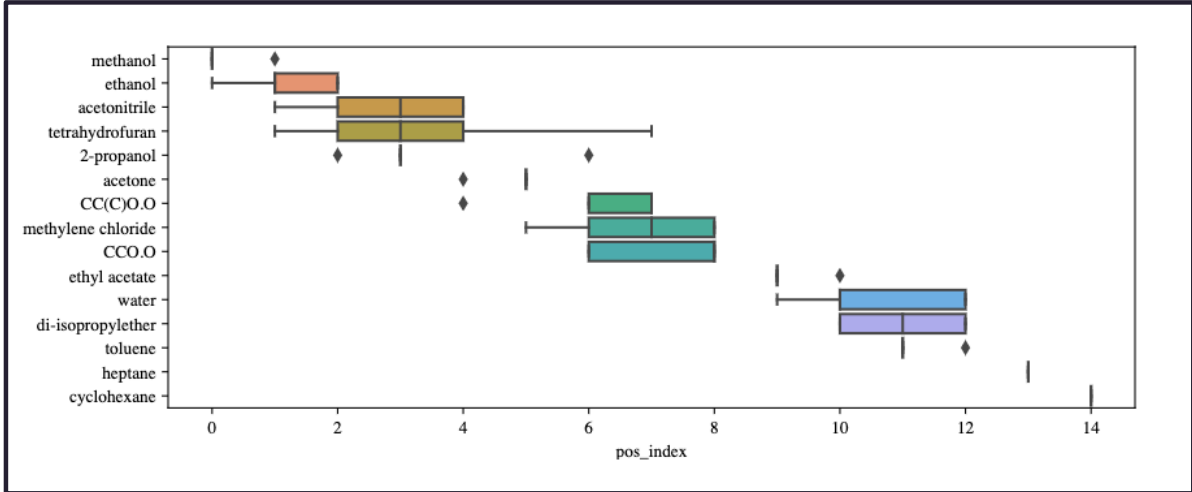

#10

solute: Abexinostat

solvents:

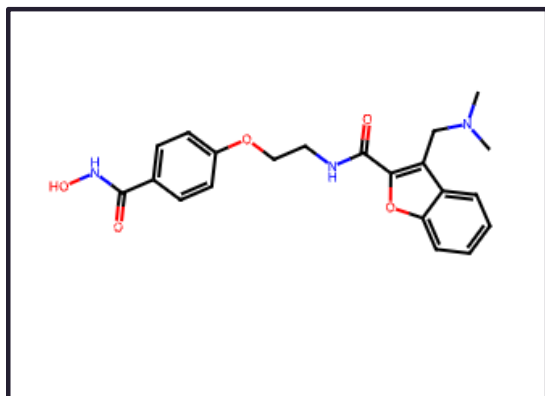

ess default + 

- cyclohexane
- octane
- heptane
- hexadecane
- nonane
- decane
- 2,2-dimethyl-4-methylpentane
- hexane
- methylcyclohexane
- water
- toluene
- benzene
- ...

ranking:

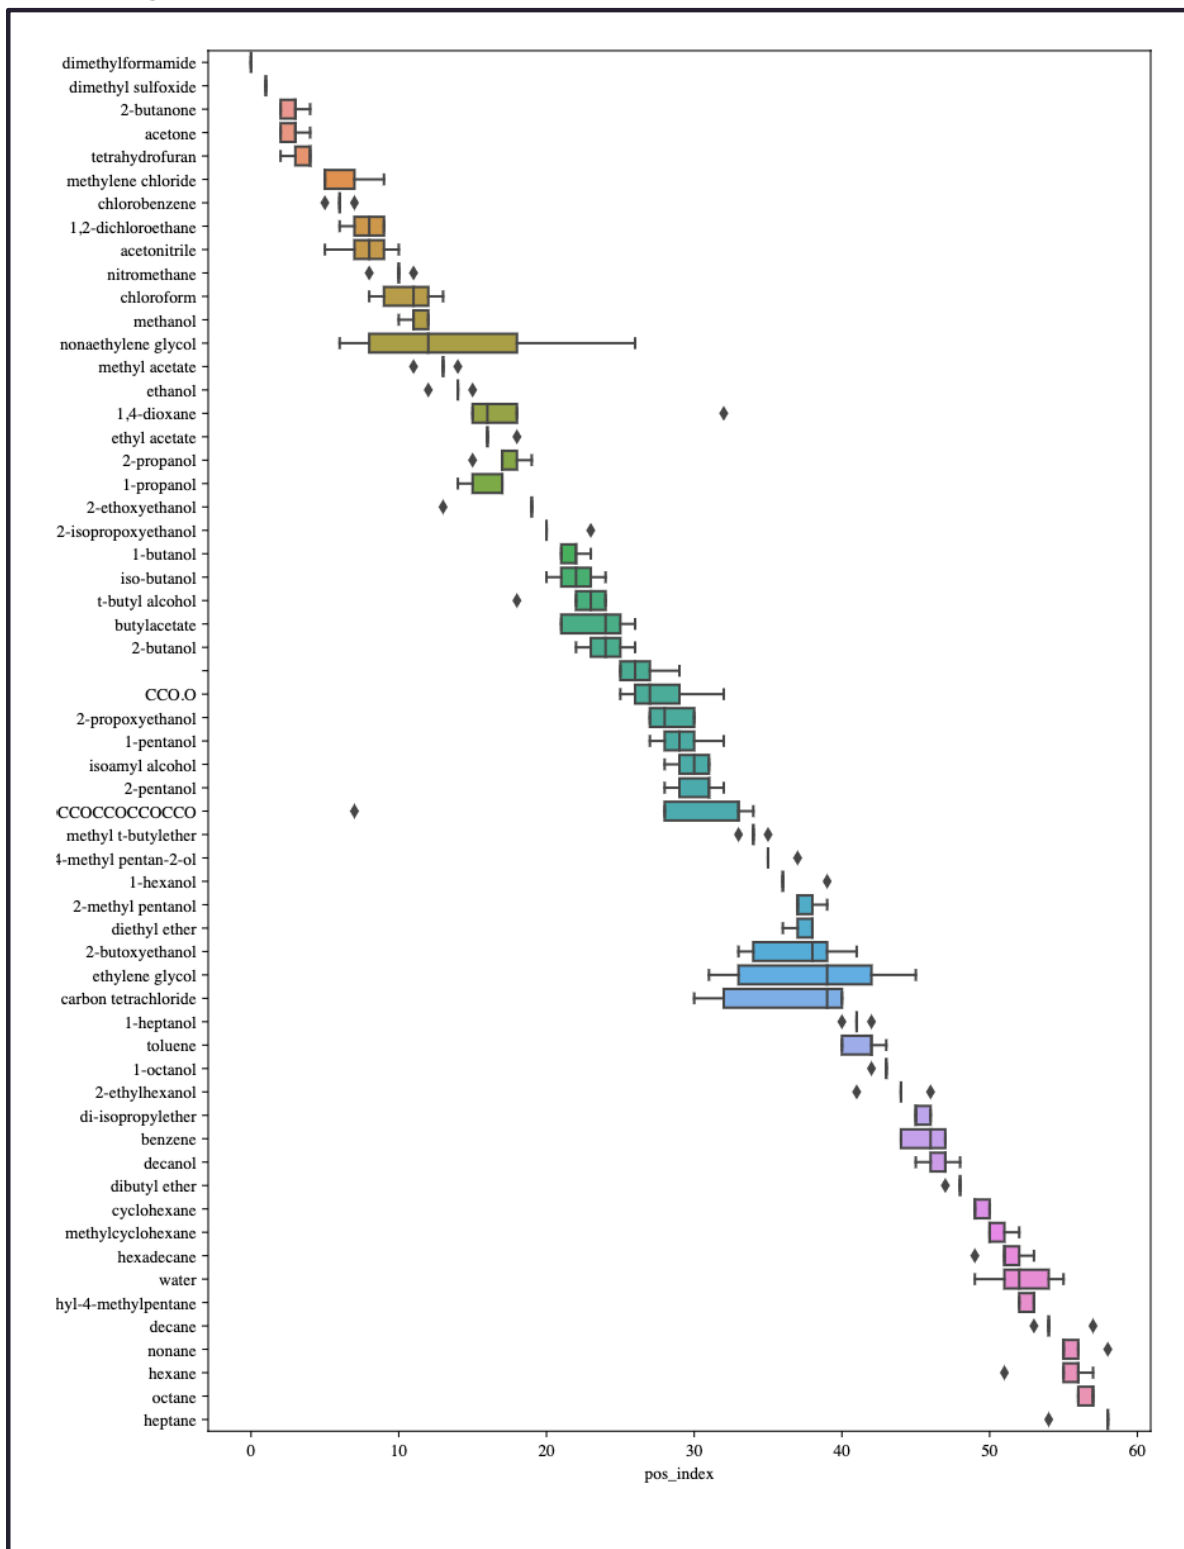



#11

solute: tetramethylammonium chloride

solvents:

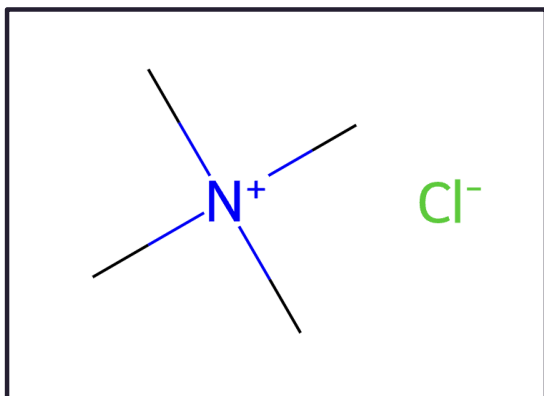

ess default + 

- n-Heptan
- Cyclohexan
- Diisopropylether
- Toluol
- Tetrahydrofuran
- Aceton
- Ethylacetat
- ACN
- 2-Propanol
- Ethanol
- EtOH / Wasser 1:1
- Methanol

ranking:

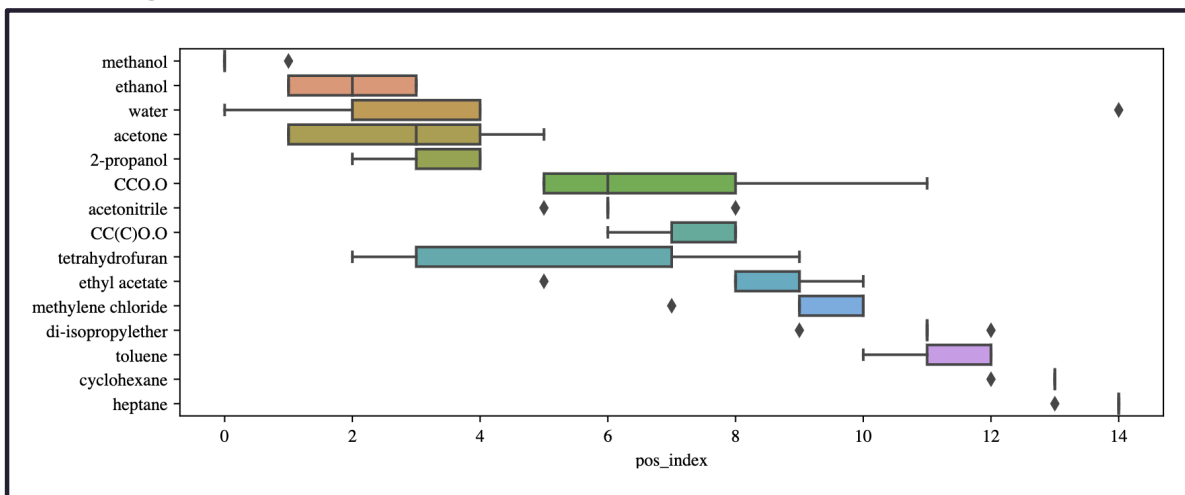

#12

solute: sodium hexafluorophosphate

solvents:

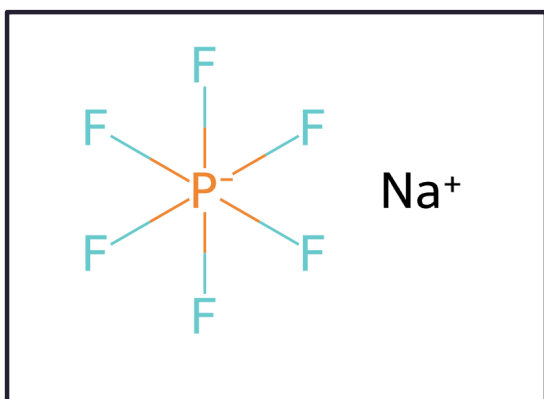

ess default + 

- n-Heptan
- Cyclohexan
- Diisopropylether
- Toluol
- Tetrahydrofuran
- Aceton
- Ethylacetat
- ACN
- 2-Propanol
- Ethanol
- EtOH / Wasser 1:1
- Methanol

ranking:

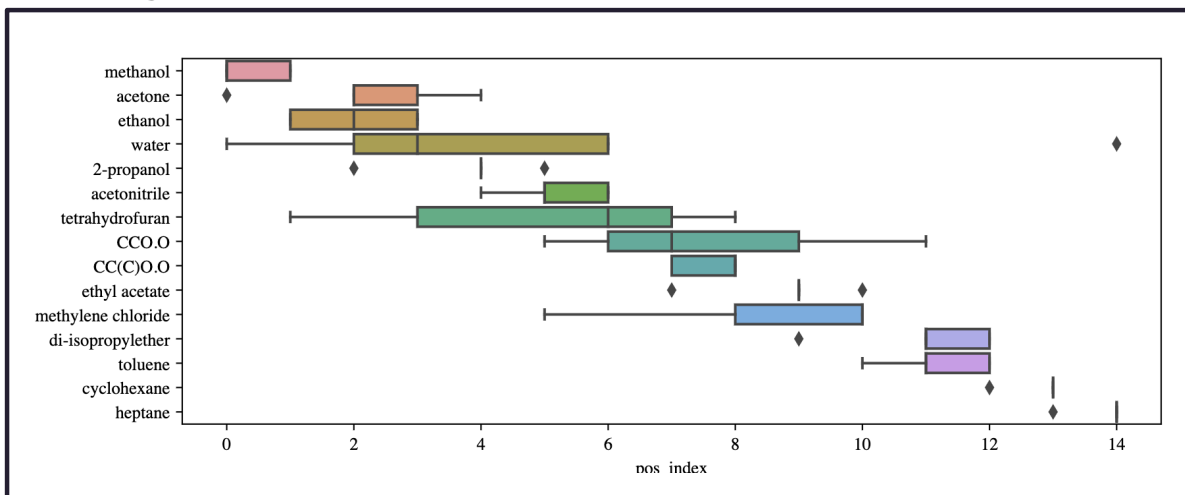

Supplement: d4dd00138a3.pdf [file d4dd00138a3.pdf]
